# Supplementary material for: SQLE facilitates laryngeal squamous cell carcinoma progression via PI3K/AKT signaling-mediated dysregulation of lipid metabolism
Source: Research Square preprint supplement (doi:10.21203/rs.3.rs-6825489/v1), 2025-06-24
Supplement: Supplementary file 1 [file 3f6e8c555a781ca8e1dc2704.docx]

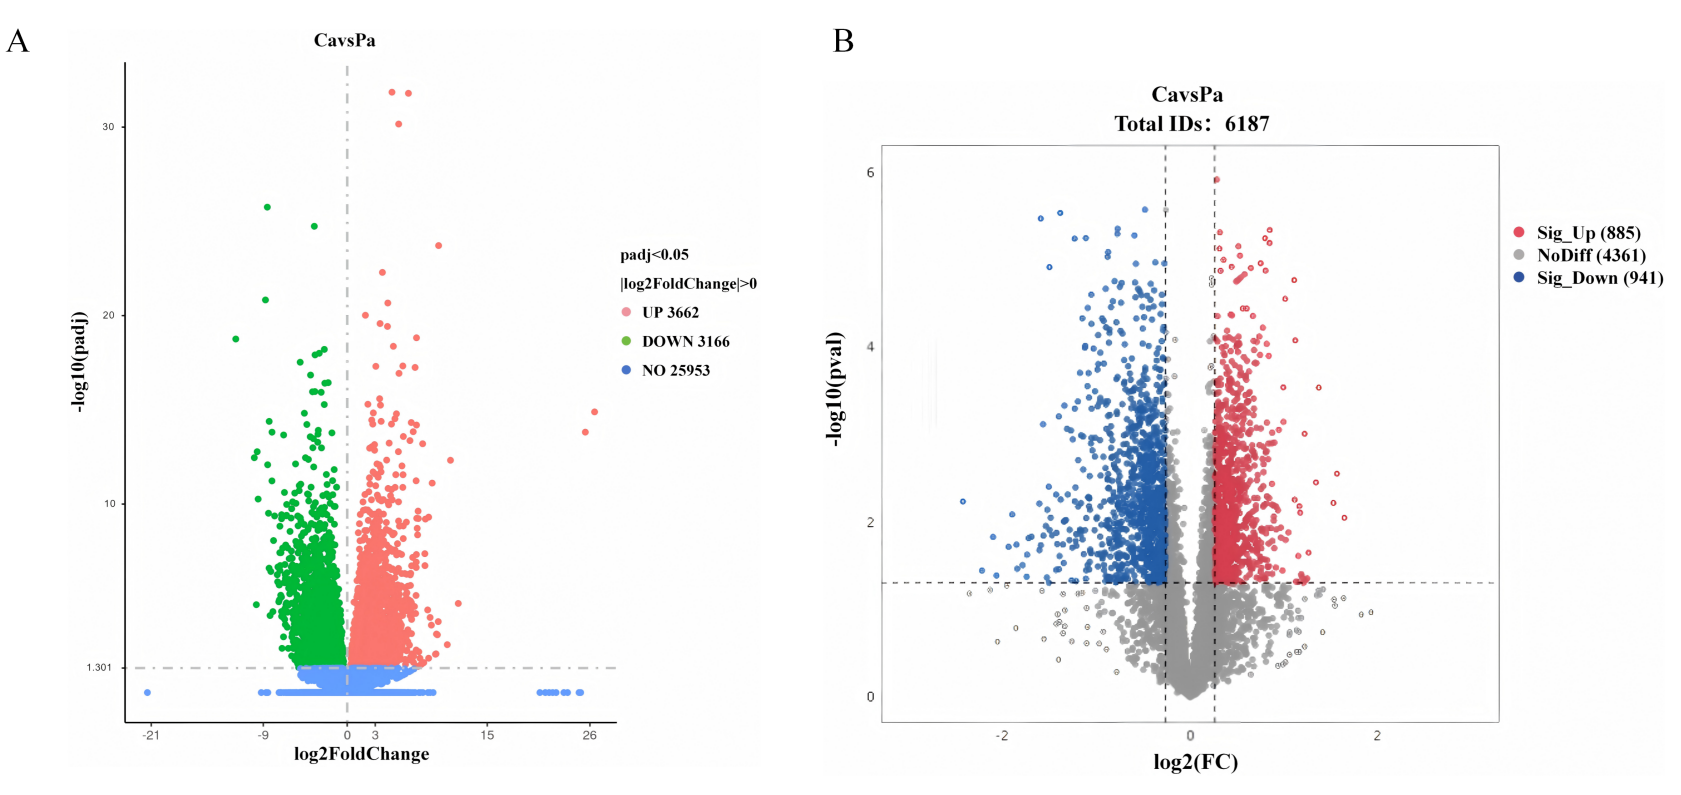


Fig. S1 **A** Proteomic volcano plot of differentially expressed proteins. **B** Transcriptomic volcano plot of differentially expressed genes.
