# Supplementary material for: SQLE facilitates laryngeal squamous cell carcinoma progression via PI3K/AKT signaling-mediated dysregulation of lipid metabolism
Source: Research Square preprint supplement (doi:10.21203/rs.3.rs-6825489/v1), 2025-06-24
Supplement: Supplementary file 2 [file 73c61578e364f528bde9b7fb.docx]

Table S2**.** Relationship between SQLE expression level and clinicopathological parameters of LSCC.

| Characteristics | n | SQLE expression | | **P* |
| --- | --- | --- | --- | --- |
| High | Low |
| **Gender** | | | | |
| Male | 69 | 31 | 38 | 0.246 |
| Female | 37 | 21 | 16 |
| **Age(years)** | | | | |
| <60 | 71 | 37 | 34 | 0.536 |
| ≥60 | 35 | 16 | 19 |
| **T classification** | | | | |
| T1-2 | 54 | 21 | 33 | 0.019* |
| T3-4 | 52 | 32 | 20 |
| **Recrudescence** | | | | |
| Negative | 52 | 28 | 39 | 0.027* |
| Positive | 54 | 25 | 14 |
| **Lymph node metastasis** | | | | |
| Negative | 60 | 22 | 38 | <0.001*** |
| Positive | 46 | 32 | 14 |
| **Primary location** | | | | |
| Supraglottic | 41 | 20 | 21 | 0.913 |
| Glottic | 65 | 31 | 34 |
| **Clinical stage** | | | | |
| I-II | 57 | 22 | 35 | 0.006** |
| III-IV | 49 | 32 | 17 |

Patients with high SQLE expression of LSCC could achieve a high clinical stage (***p*<0.01) and T classification (**p*<0.05). In addition, patients with high SQLE had lymph node metastasis (****p*<0.001) and frequent recurrence (***p*<0.01).
