# Supplementary material for: SQLE facilitates laryngeal squamous cell carcinoma progression via PI3K/AKT signaling-mediated dysregulation of lipid metabolism
Source: Research Square preprint supplement (doi:10.21203/rs.3.rs-6825489/v1), 2025-06-24
Supplement: Supplementary file 3 [file 7a833acdbe10b51a23dec58e.docx]

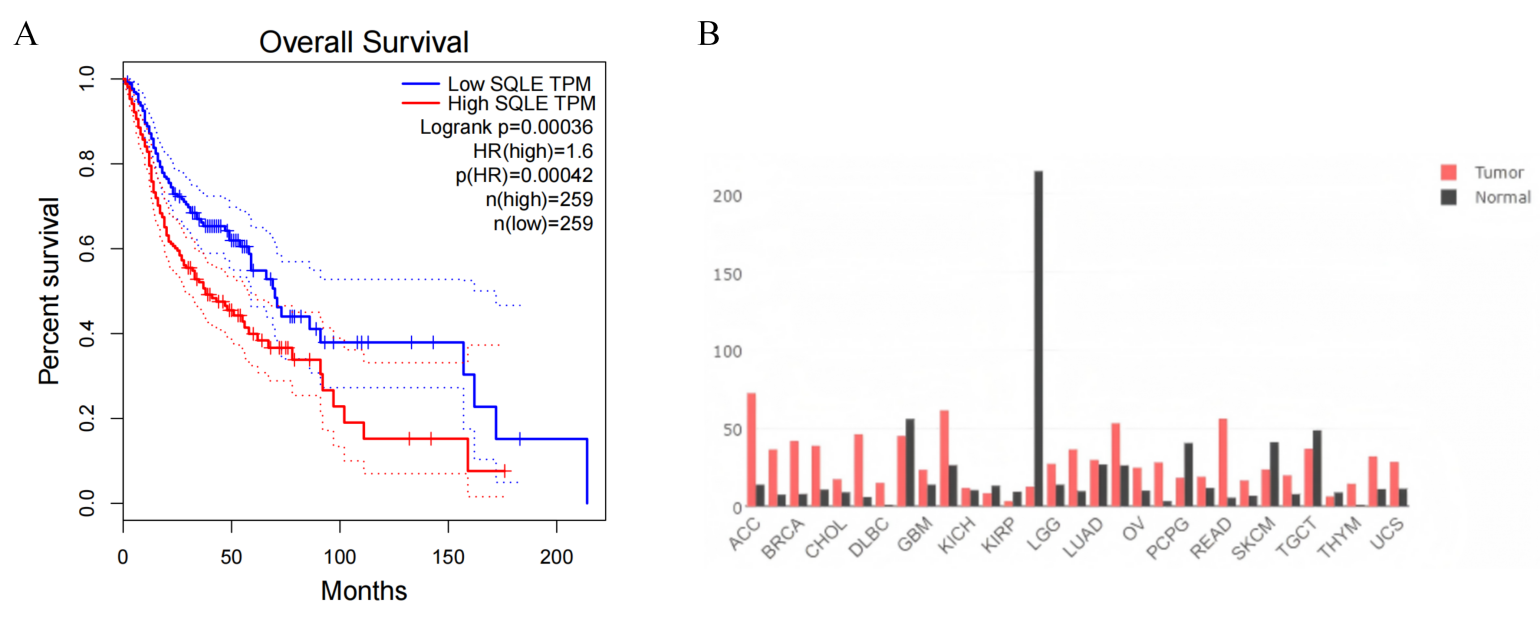


Fig. S2 **A** Survival analysis levels of SQLE predicted from GEPIA database. **B** The pan-cancer analysis of SQLE by GEPIA database.
