# Supplementary material for: SQLE facilitates laryngeal squamous cell carcinoma progression via PI3K/AKT signaling-mediated dysregulation of lipid metabolism
Source: Research Square preprint supplement (doi:10.21203/rs.3.rs-6825489/v1), 2025-06-24
Supplement: Supplementary file 4 [file e6a145993c84fc0266eefec8.docx]

Table. S1 The primers of SQLE and GAPDH RT-qPCR

| Mature_ ID | Primer |
| --- | --- |
| SQLE | **F:5′-GGCATTGCCACTTTCACCTAT-3′** |
|  | **R:5′-GGCCTGAGAGAATATCCGAGAAG-3′** |
| GAPDH | **F:5′-TGTGGGCATCAATGGATTTGG-3′** |
|  | **R:5′-ACACCATGTATTCCGGGTCAAT-3′** |
